# Supplementary material for: Stretching the skin immediately enhances perceived stiffness and gradually enhances the predictive control of grip force
Source: eLife journal article supplement (doi:10.7554/elife.52653), 2020-04-15
Supplement: supp [file elife-52653-supp-v1.zip]

Archive with 2 entries (2 files):
- elife_poa_e52653_Transparent_Reporting_File.pdf
- elife_poa_e52653_Video_1.mp4
